# Supplementary material
Source: HighWire-hosted journal article supplement (https://jitc.bmj.com/content/9/6/e002715)

# Figure S2: Gating Strategy Used to Analyze Immune Cell Components of Spleen

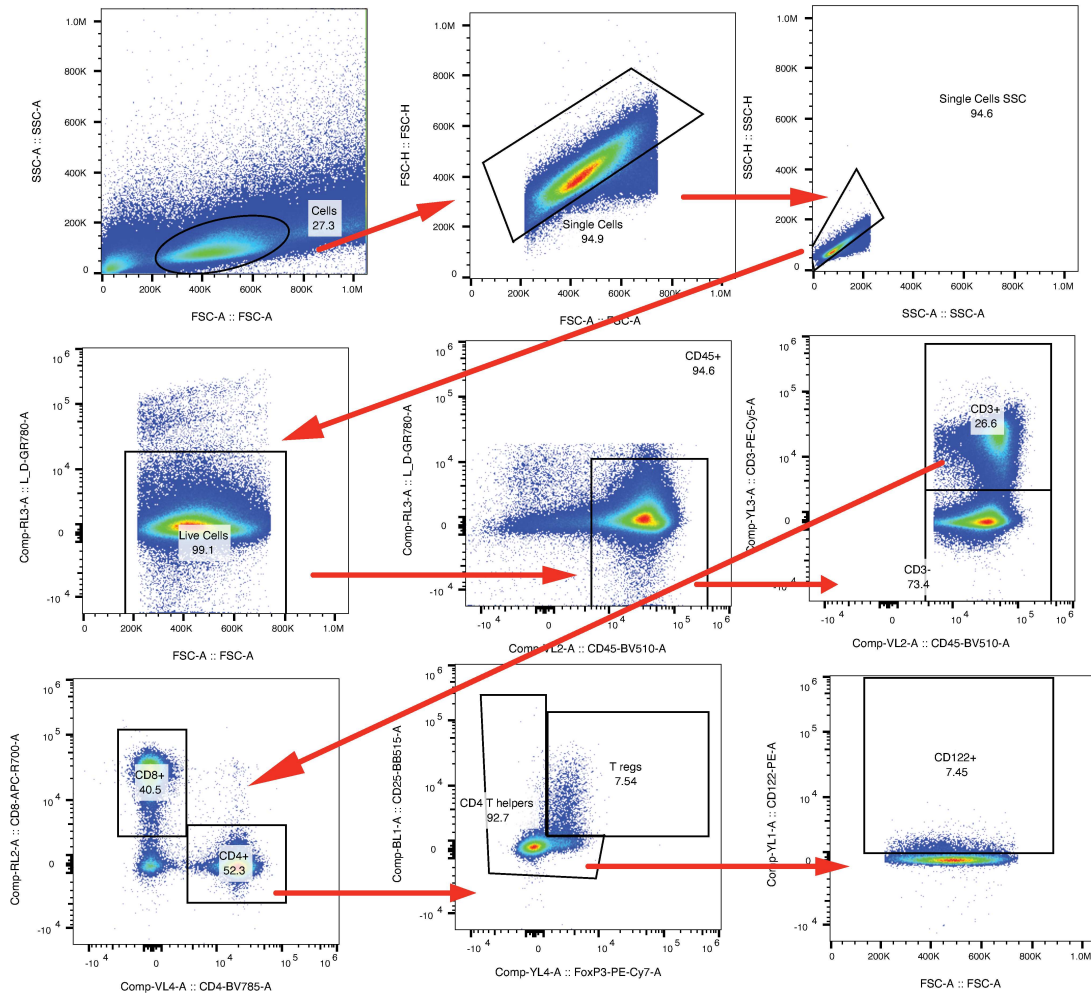

Supplement: inline-supplementary-material-2 [file inline-supplementary-material-2.pdf]
